# Supplementary material for: Fungal Communication Requires the MAK-2 Pathway Elements STE-20 and RAS-2, the NRC-1 Adapter STE-50 and the MAP Kinase Scaffold HAM-5
Source: PubMed Central journal article supplement (PMC4239118; doi:10.1371/journal.pgen.1004762), 2014-11-20

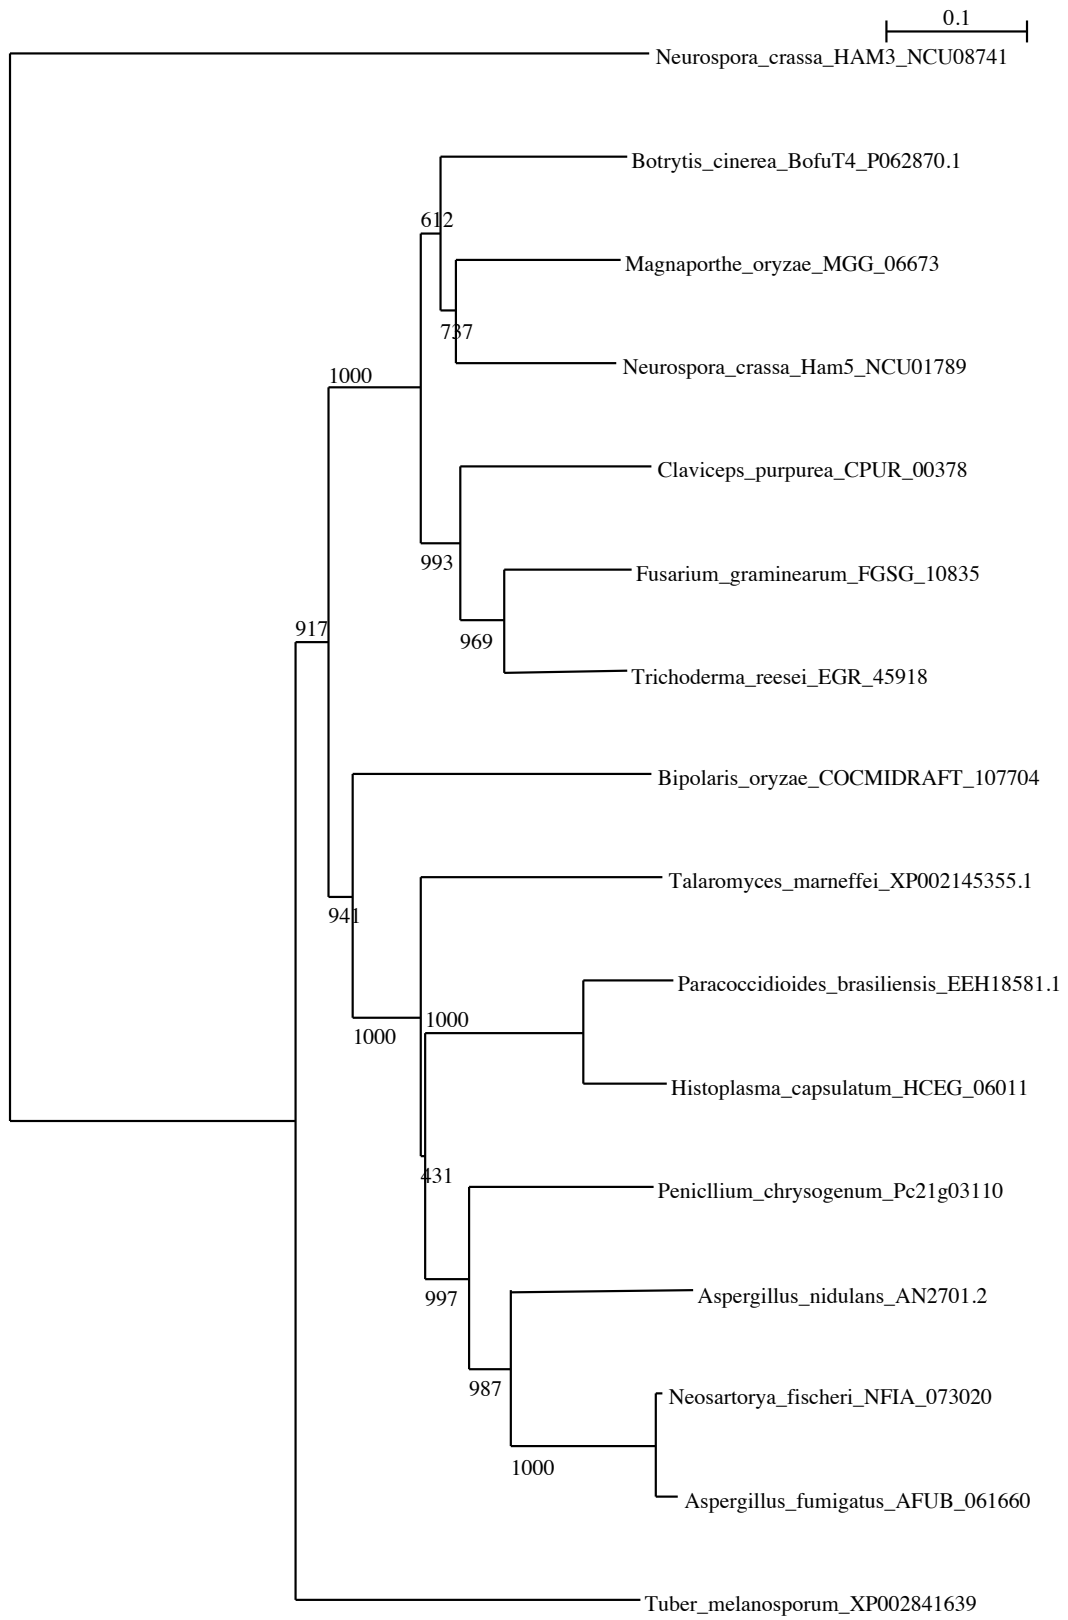

Supplement: pgen.1004762.s006.pdf [file pgen.1004762.s006.pdf]
